# Supplementary material
Source: PubMed Central journal article supplement (PMC3956300)
Supplement: NIHMS358981-supplement-Figs_S3_S4.pdf [file NIHMS358981-supplement-Figs_S3_S4.pdf]

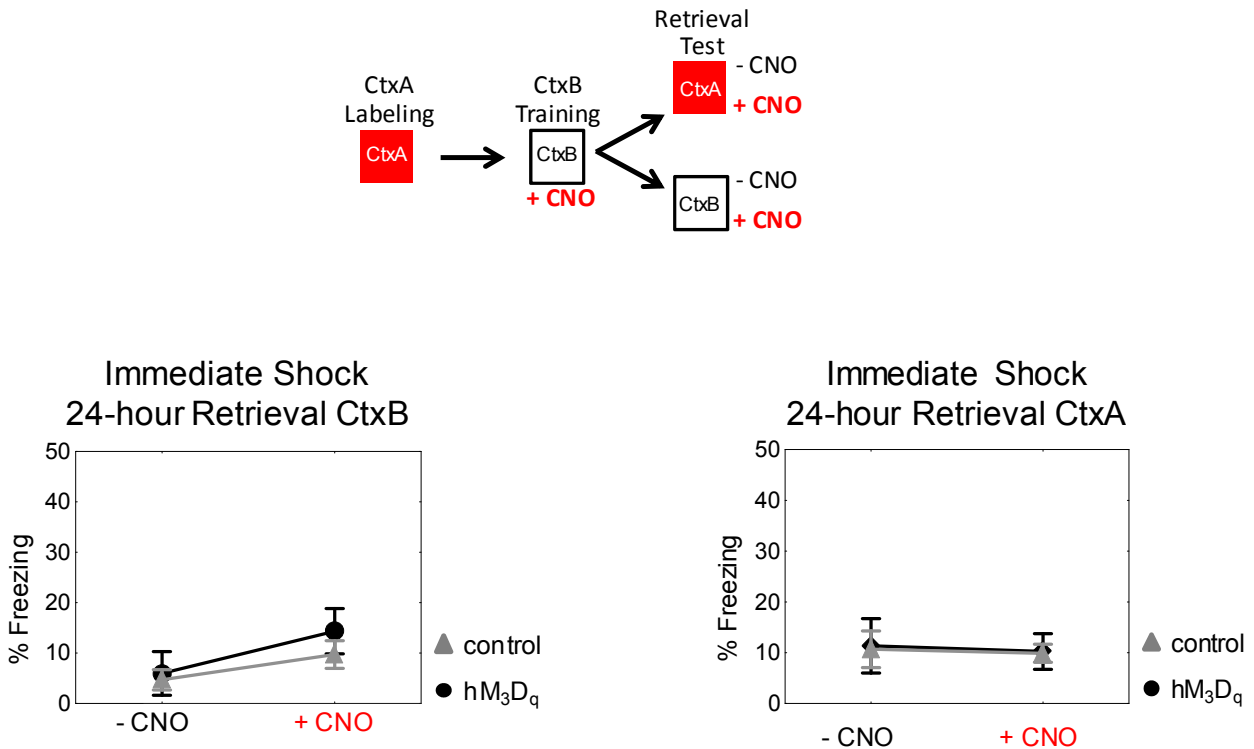

**Fig. S3:** CNO-induced neural activity cannot be used alone as a conditioned stimulus. hM<sub>3</sub>D<sub>q</sub><sup>fos</sup> n = 4, control n = 6 Repeated measures ANOVA context A  $F(1,6) = 0.028$ ,  $p = 0.873$  context B  $F(1,6) = 0.336$ ,  $p = 0.583$ .

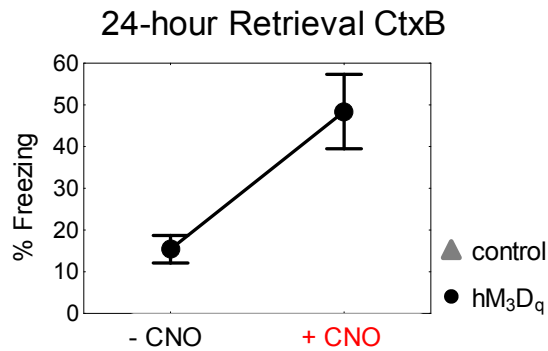

**Fig. S4:** To ensure that CNO-induced artificial activity during learning is incorporated into the memory representation and does not result in a low level ceiling effect for memory retrieval we repeated the experiment presented in Fig 2B and S1. hM<sub>3</sub>D<sub>q</sub><sup>fos</sup> mice that failed to show remote memory recall as described in Fig 4A were re-exposed to a novel context A and fear conditioned the following day in the presence of CNO. When tested 24-hours later mice still show impaired memory for ctxB, but this impairment is now rescued by injection of CNO. hM<sub>3</sub>D<sub>q</sub><sup>fos</sup> n = 8. Student's t-test  $t = -3.47$ ,  $p = 0.00375$ .
