# Supplementary material
Source: PubMed Central journal article supplement (PMC3956300)
Supplement: NIHMS358981-supplement-Figure_S5.pdf [file NIHMS358981-supplement-Figure_S5.pdf]

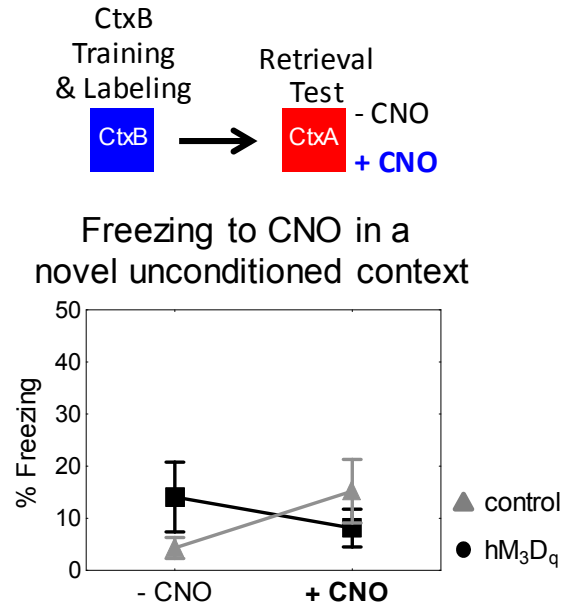

**Fig. S5:** To test the ability of CNO to activate a contextual representation in a novel unconditioned context, we fear conditioned mice off Dox to label shock-associated CtxB neurons and then tested in CtxA in the presence of CNO. Neither  $hM3D^{fos}$  or control mice showed significant freezing in the novel unconditioned context in the absence or presence of CNO.  $hM3D^{fos}$   $n = 6$ , control  $n = 6$ . Repeated measures ANOVA genotype x CNO interaction  $F(1,10) = 2.47$ ,  $p = 0.147$
